# Supplementary material
Source: publisher figshare collection journal article supplement (https://tandf.figshare.com/ndownloader/files/30927055)
Supplement: Supplementary file 1 [file 30927055]

Archive with 3 entries (3 files):
- matrix-em-supplement.pdf
- MixMatrix_0.2.4.tar.gz
- Code-and-Data.zip
